# Supplementary material for: Multiplex CRISPR/Cas9-based genome engineering enhanced by Drosha-mediated sgRNA-shRNA structure
Source: PubMed Central journal article supplement (PMC5150520; doi:10.1038/srep38970), 2016-12-12
Supplement: srep38970-s1.pdf [file srep38970-s1.pdf]

**Multiplex CRISPR/Cas9-based genome engineering enhanced by  
Drosha-mediated sgRNA-shRNA structure**

Qiang Yan<sup>#1</sup>, Kun Xu<sup>#1</sup>, Jiani Xing<sup>1</sup>, Tingting Zhang<sup>2</sup>, Xin Wang<sup>1</sup>, Zehui Wei<sup>1</sup>, Chonghua Ren<sup>1</sup>, Zhongtian Liu<sup>1</sup>, Simin Shao<sup>1</sup>, Zhiying Zhang<sup>\*1</sup>

<sup>1</sup> College of Animal Science and Technology, Northwest A&F University, Yangling 712100, Shaanxi, China

<sup>2</sup> Institute of applied biology, Shanxi University, 030006, Shanxi, China

<sup>#</sup> These authors contributed equally to this work.

<sup>\*</sup> To whom correspondence should be addressed. Tel: 029-87092120.

Fax: 029-87092164. Email: zhangzhy@nwsuaf.edu.cn.

## Supplementary Information

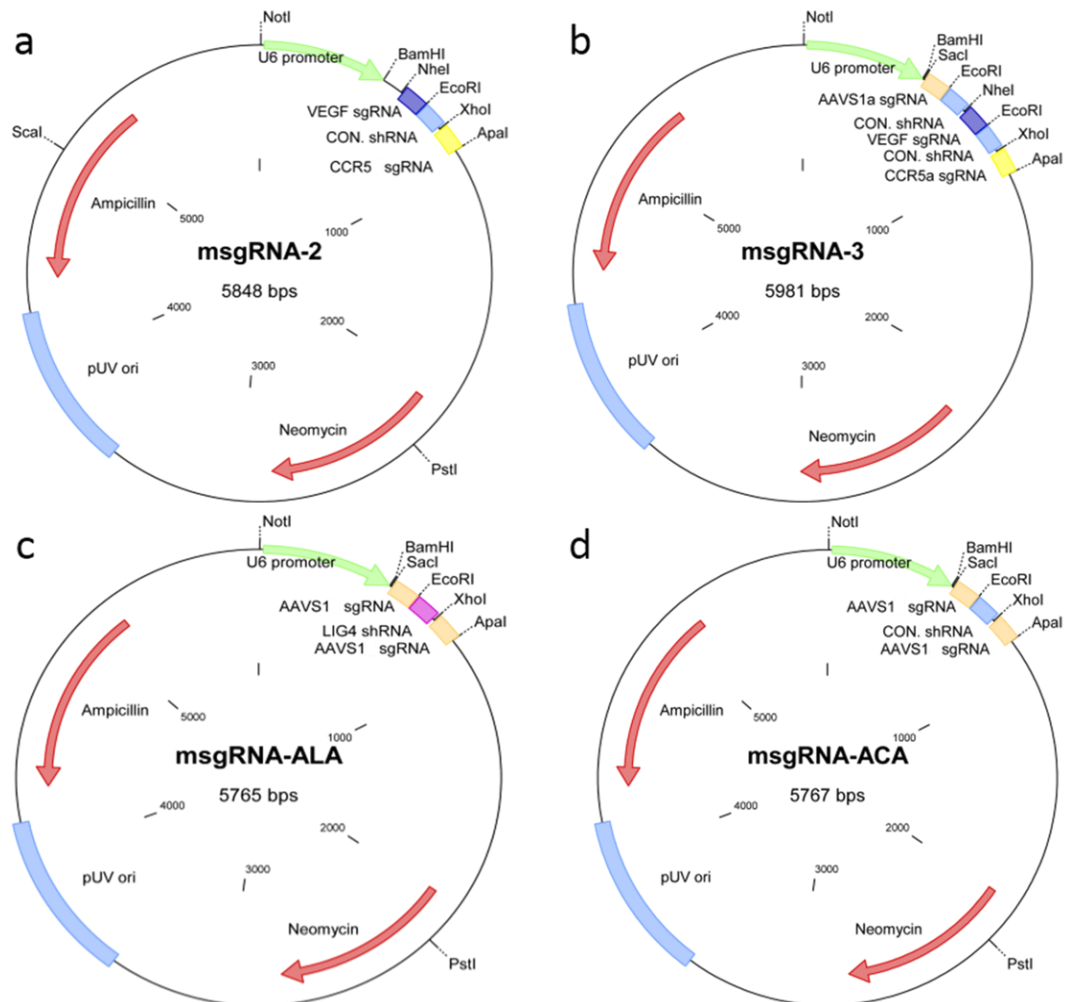

**Supplementary Figure 1** Plasmid maps for the constructs: (a) msgRNA-2, (b) msgRNA-3, (c) msgRNA-ALA and (d) msgRNA-ACA

Target site
PAM

```

GCTCTGGTTCTGGGTACTTTTATCTGTCCCCTCCACCCCA CAGTGGGGCCACTAGGGAC (WT)
GCTCT-GTTCTGGGTACTTTTATCTGTCCCTCCACCCCA CAGTGGGGCCACTAGGGAC (-2)
-----TCCACagaA t c a g G G G G a t a A C g c a G G A a (-45,+14)
GCTCTGGTTCTGGGTACTTTTATCTGTCCCCTCCACCCCA aCAGTGGGGCCACTAGGGAC (+1) (X3)
G-----A C A t a G G G G C -----C (-49,+2) (X2)
GCTCTGGTTCTGGGTACTTTTATCTGTCCCCTC----- C A G T G G G G C C A C T A G G G A C (-7)
GCTCTGGTTCTGGGTACTTTTATCTGTCCCCTCCACCCCA ----- (-18)
GCTCTGGTTCTGGGTACTTTTATCTGTCCCCTCCACC-----CCACTAGGGAC (-11)
GCTCTGGTTCTGGGTACTTTTATCTGTCCCCT-----CCACTAGGGAC (-16)

```

(a) AAVS1 site (11/12, 91.67%)

Target site
PAM

```

GGGGGCGCTCGGCCACCACAGGGA A G C T G G GTGA (WT)
-----GTGA (-30)
GGGGGCGCTCGGCCACCACAGGGA t g t g c A G C T G G GTGA (+5)

```

(b) VEGF site (2/9, 22.22%)

Target site
PAM

```

GAT CACTTGTGTCACCACCCCAAAGGTGGACCGTCC (WT)
GAT CACTTGTGTCACCACCCCAA t c t a G G A C C G T C C (-4,+4) (X5)
G t T C A C A C T T G T C A C C A C C C C A A t c t a G G A C C G T C C (-5,+5)

```

(c) CCR5 site (6/7, 85.71%)

**Supplementary Figure 2** The indels within the detected “T-A clones” from the cell pool

targeted by msgRNA-3. (a) AAVS1 site, (b) VEGF site, (c) CCR5 site

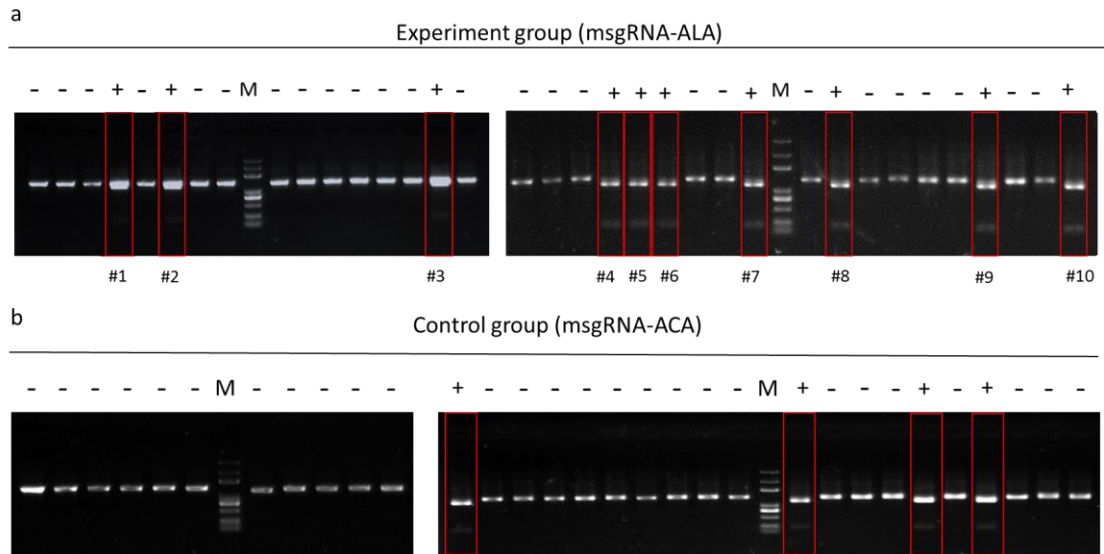

**Supplementary Figure 3** The results for the detection of genome edited positive clones by *EcoR I* -digesting assay. The PCR product was supposed to be 1397 bp in length and could be digested into two fragments (1194 bp and 203 bp) if the genome DNA had been successfully edited by HDR-based repair. The PCR product would be partially digested if the clone was heterozygotes with only one allele edited. Percentage of digestion positive clones within detected clones was calculated to evaluate the precise genome editing efficiency. The results demonstrated 10 positive clones out of 35 cell clones (10/35) for the msgRNA-ALA group, while 4 out of 31 clones (4/31) for the msgRNA-ACA control. However, the pictures and the bands were not clear for confirming whether one or both alleles were edited. Further repeat detection of these positive clones demonstrated that they were all heterozygotes with one allele edited (refer to Fig.4e in the manuscript).

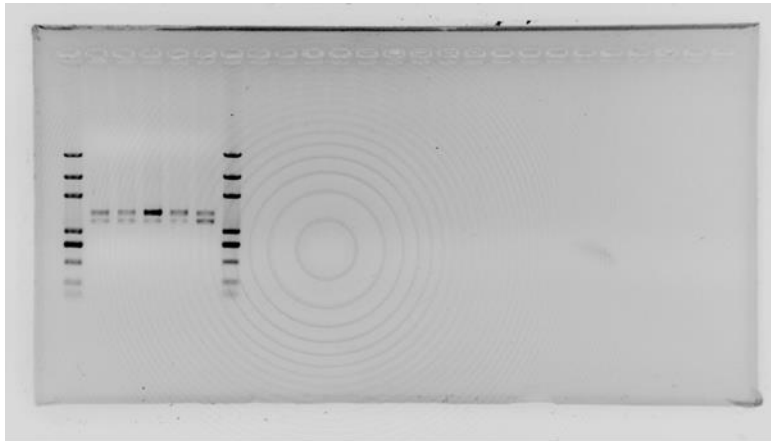

a

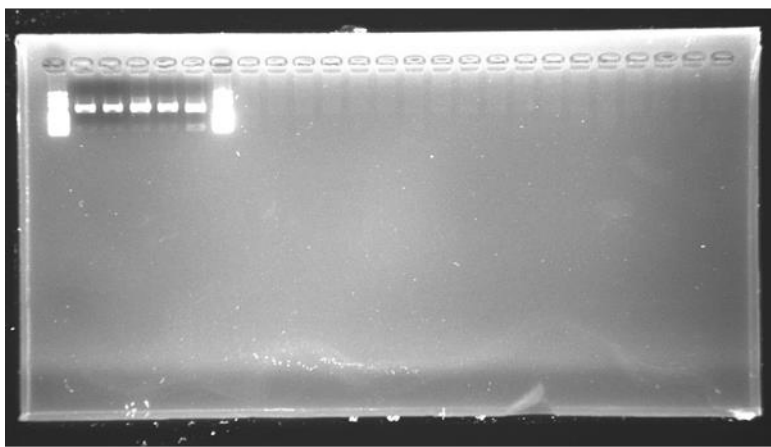

b

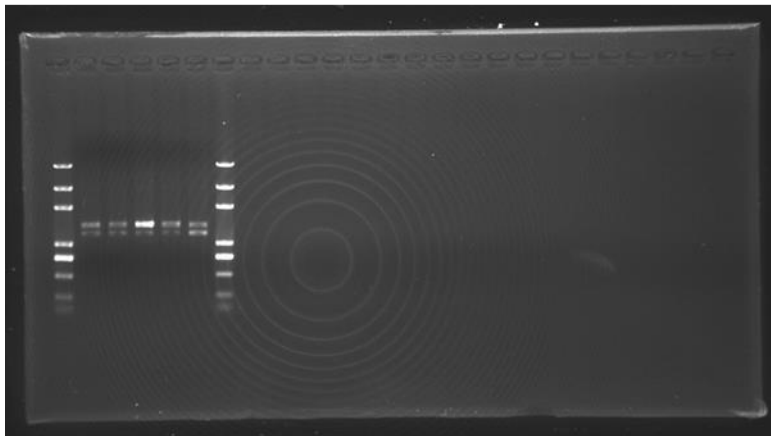

c

**Supplementary Figure 4** Full-length gel images of representative results for the detection of positive clones by EcoR I digestion. (a) Full-length gel of Fig. 4e in the manuscript. (b)

Overexposure after a shorter electrophoresis period for a clear vision of the 203bp band. (c)  
 Normal-length exposure after a longer electrophoresis period for a clear vision of the 1397 bp  
 and 1194 bp bands.

**Supplementary Table 1** Transfection groups set for the DsRed-eGFP surrogate reporter assay

|                    | Cas9 vector                | msgRNA      | Reporter | Group            |
|--------------------|----------------------------|-------------|----------|------------------|
| Molar ratio        | 1                          | 1.5         | 0.8      |                  |
| VEGF target groups | pll3.7-U6-CMV-hStCas9      | msgRNA-2    | pRG.VEGF | Experiment group |
|                    | pll3.7-U6-VEGF-CMV-hStCas9 | pcDNA3.1(+) | pRG.VEGF | Positive control |
|                    | pll3.7-U6-CMV-hStCas9      | pcDNA3.1(+) | pRG.VEGF | Negative control |
| CCR5 target groups | pll3.7-U6-CMV-hStCas9      | msgRNA-2    | pRG.CCR5 | Experiment group |
|                    | pll3.7-U6-CCR5-CMV-hStCas9 | pcDNA3.1(+) | pRG.CCR5 | Positive control |
|                    | pll3.7-U6-CMV-hStCas9      | pcDNA3.1(+) | pRG.CCR5 | Negative control |

**Supplementary Table 2** Transfection groups set for the multiplex genome targeting assay

|                     | Cas9 vector                 | msgRNA      | Reporter   | Group              |
|---------------------|-----------------------------|-------------|------------|--------------------|
| Molar ratio         | 1                           | 1.5         | 0.8        |                    |
| AAVS1 target groups | pll3.7-U6-CMV-hStCas9       | msgRNA-3    | pRPG.AAVS1 | Experiment 1       |
|                     | pll3.7-U6-AAVS1-CMV-hStCas9 | pcDNA3.1(+) | pRPG.AAVS1 | Positive control 1 |
| VEGF target groups  | pll3.7-U6-CMV-hStCas9       | msgRNA-3    | pRPG.VEGF  | Experiment 2       |
|                     | pll3.7-U6-VEGF-CMV-hStCas9  | pcDNA3.1(+) | pRPG.VEGF  | Positive control 2 |

|             |                            |             |           |                    |
|-------------|----------------------------|-------------|-----------|--------------------|
| CCR5 target | pll3.7-U6-CMV-hStCas9      | msgRNA-3    | pRPG.CCR5 | Experiment 3       |
| groups      | pll3.7-U6-CCR5-CMV-hStCas9 | pcDNA3.1(+) | pRPG.CCR5 | Positive control 3 |

**Supplementary Table 3** Diplex and triplex targeted positive clones detected in the multiplex genome targeting assay

| Groups            | Number of diplex and triplex targeted positive clones/Detected cell clones |              |               |                     |
|-------------------|----------------------------------------------------------------------------|--------------|---------------|---------------------|
|                   | AAVS1 & VEGF                                                               | VEGF & CCR5  | AAVS1 & CCR5  | AAVS1 & VEGF & CCR5 |
| Experiment 1      | 1/12                                                                       | 0/12         | 2/12          | 1/12                |
| Experiment 2      | 1/10                                                                       | 1/10         | 1/10          | 1/10                |
| Experiment 3      | 0/10                                                                       | 0/10         | 1/10          | 1/10                |
| General frequency | 6%<br>(2/32)                                                               | 3%<br>(1/32) | 13%<br>(4/32) | 9%<br>(3/32)        |

**Supplementary Table 4** The overall mutated clones for each targeted locus in the multiplex genome targeting assay

| Groups             | Mutated clones/Detected clones |            |             | Remarks                |
|--------------------|--------------------------------|------------|-------------|------------------------|
|                    | AAVS1                          | VEGF       | CCR5        |                        |
| Experiment 1       | 11/12                          | 2/12       | 4/12        | pRPG.AAVS1 as reporter |
| Experiment 2       | 6/10                           | 3/10       | 5/10        | pRPG.VEGF as reporter  |
| Experiment 3       | 9/10                           | 1/10       | 2/10        | pRPG.CCR5 as reporter  |
| General frequency  | 81% (26/32)                    | 19% (6/32) | 34% (11/32) |                        |
| Positive control 1 | 100% (6/6)                     | -          | -           | pRPG.AAVS1 as reporter |
| Positive control 2 | -                              | 100% (8/8) | -           | pRPG.VEGF as reporter  |

**Supplementary Table 5** Primers used in Quantitative RT-PCR assay

| Primer name  | Sequence                  | Remarks                        |
|--------------|---------------------------|--------------------------------|
| qP-LIG4.F    | GCCCCGAGGCCAGTTAAACGAGAAG | For <i>LIG4</i> gene in the    |
| qP-LIG4.R    | GTGGTTCTTATGAAGAGCATCATG  | qRT-PCR assay                  |
| ACTB forward | ATTGCCGACAGGATGCAGA       | For $\beta$ -actin gene in the |
| ACTB reverse | GAGTACTTGCGCTCAGGAGGA     | qRT-PCR assay                  |

**Supplementary Sequence 1** The DNA sequence designed for the msgRNA-2 construct

(between *NheI* and *ApaI* cutting site).

```

_NheI_
gctagcctcg gccaccacag ggaagcgttt tagagctaga aatagcaagt taaaataagg ctagtccggt atcaactga aaaagtggca ccgagtcggt gctttgaatt
cgatcggagc cgggtggtgc ccttcgcaaa atctcgatct ttatcgttca atttttatcc gatcaggcaa tagttgaact ttttcacggt ggctcagcca cgaacttaa
VEGF sgRNA scaffold
_XhoI_
ccgaggcagt aggcacacac tcaaccttta tatttactac atctgtggtc tcactagtaa atataaaggT tgagtgttcg ctcactgtca acagcatata cttctcgag
ggctccgtoa tccgtgtgtg agttggaaat ataaatgatg tagacaccga agtgatcatt tatatttcca actcacaagc gagtgcagct tgctgtatat ggaagagctc
drosha cutting site CON. shRNA drosha cutting site
_ApaI_
cacacttgtc accaccccaa gttttagagc tagaaatagc aagttaaaat aaggctagtc cgttatcaac ttgaaaaagt ggcaccgagt cgggtcgttt ttgggcccgt
gtgtgaacag tgggtgggtt caaaatctcg atctttatcg ttcaatttta ttccgatcag gcaatagtty aactttttca ccgtggctca gccacgaaaa aaccgggcca
CCR5 sgRNA scaffold

```

**Supplementary Sequence 2** The DNA sequence designed for the msgRNA-3 construct

(between *SacI* and *ApaI* cut sites).



SacI  
 gagctcctgt cccctccacc ccacaggttt tagagctaga aatagcaagt taaataagg ctagtccgtt atcaactga aaaagtggca ccgagtcggt gctttgact ccgaggcagt aggcacacac tcaacttta  
 ctcgaggaca ggggaggtgg ggtgtccaaa atctcgatct ttatcgttca atttttatcc gacagggcaa tagtgaact ttttccact ggctcagcca cgaacttaa ggctccgtca tccgtgtgtg agttggaat  
 AAVS1 sgRNA scaffold Drosha cutting site

NheI  
 tattactac atctgtggt tcaactagta atataaagt tgagtgttcg ctcactgtca acagcatata ccttgctagc ctgggccacc acagggaaag gttttagagc tagaaatagc aagttaaaat aaggctagtc  
 ataaaatgat tagacacaga agtgatcatt tatatttcca actcaaaagc gaggacagt tgcgttatat ggaacgacag gggccggctg tgcctcttcg caaaactcag atctttatcg tcaatttta ttcgacacg  
 CON.shRNA Drosha cutting site VEGF sgRNA scaffold

EcoRI  
 cgttatcaac ttgaaaaagt ggcaccgagt cgtgtcttg aattccgagg cagtaggcac acactcaacc tttatatta ctacatctgt ggcttcaact gtaaatata aggttgagt ttcgtcact gccaacagca  
 gcaatagttg aactttttoa cgttgctca gccacgaac ttaaggctcc gtcctcgtg tgtgagttgg aatataat gatgtagaca ccgaagtgat catttatatt tccaactcac aagcagtgca cagttgtcgt  
 Drosha cutting site CON.shRNA Drosha cutting site

XbaI  
 tataccttct cgggcacact tgcaccacc ccaagtttta gagctagaaa tagcaagtta aaataaggt agtcggtat caactgaaa aagtggacc gactcgtgc tttttgggc ccgtttaaac ccgctgatca  
 atatggaaag gctcgtgtga acagtggtg ggtcaaat ctogatcttt atcgttcaat tttattcca tcaggaata gttgaactt ttcacgttg ctagccacg aaaaacccc ggcgaatttg ggcgactagt  
 CCR5 sgRNA scaffold
